# Supplementary material for: Dietary Patterns among Adolescents Are Associated with Growth, Socioeconomic Features, and Health-Related Behaviors
Source: Foods. 2021 Dec 8;10(12):3054. doi: 10.3390/foods10123054 (PMC8700870; doi:10.3390/foods10123054)
Supplement: Supplementary file 1 [file foods-10-03054-s001.zip › foods-1478384-supplementary.pdf]

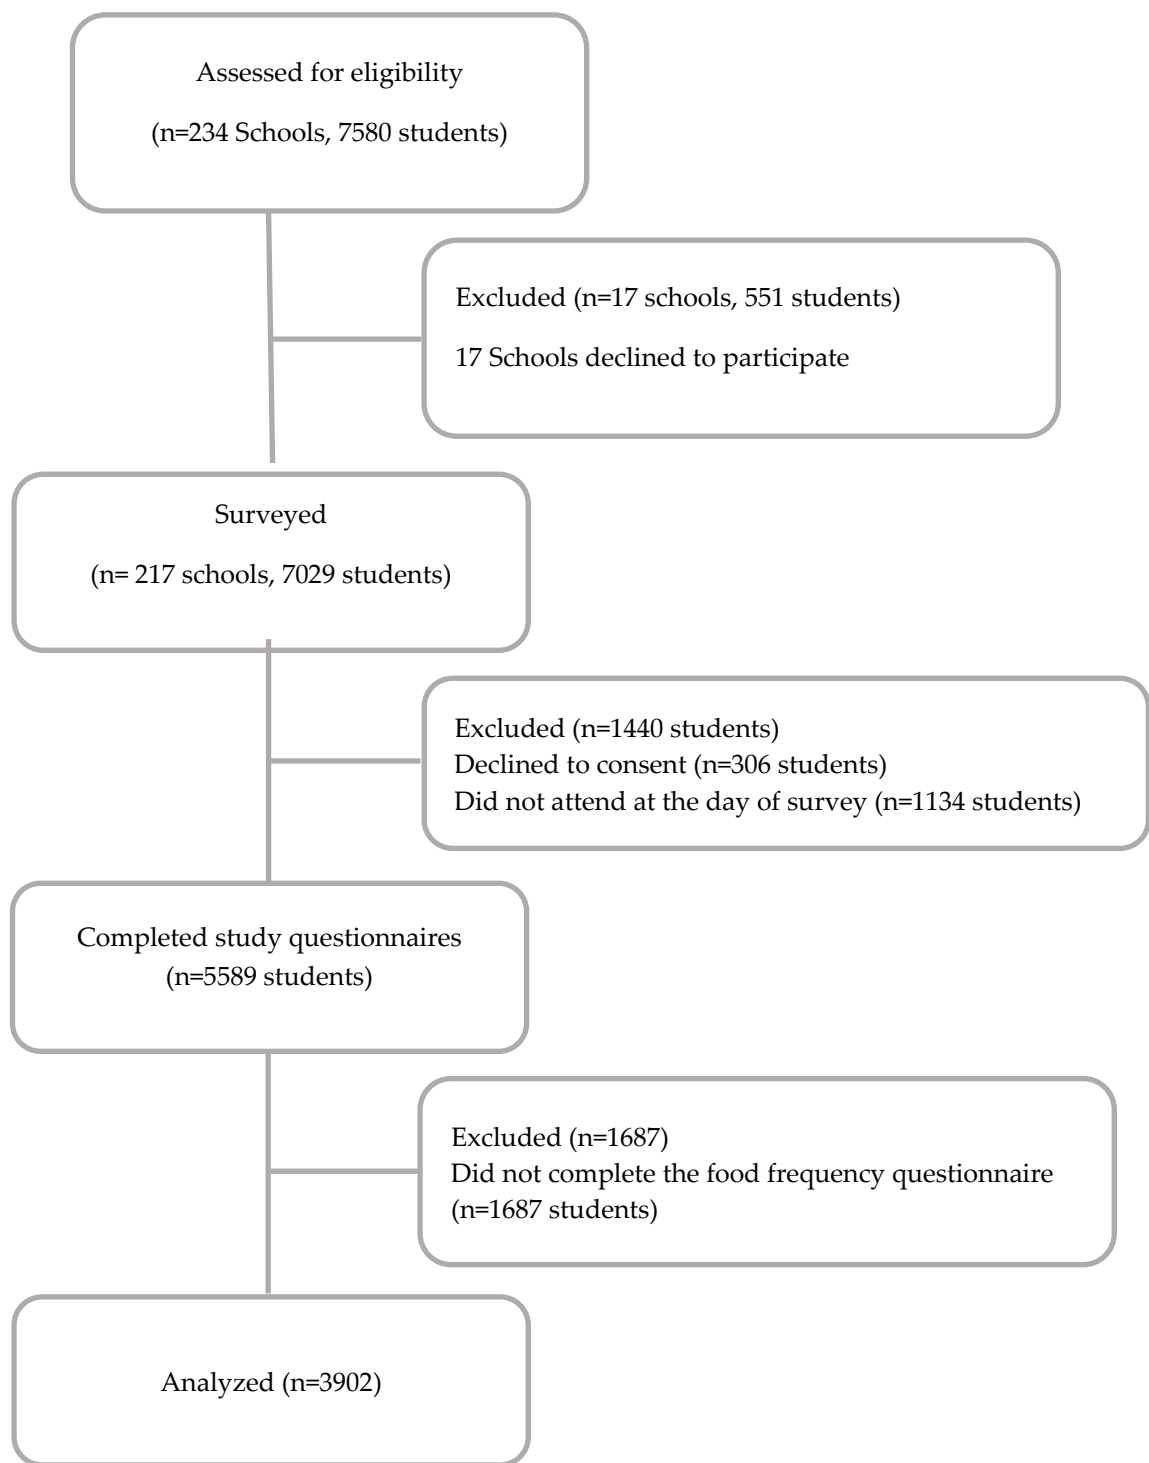

**Figure S1.** Flowchart of study participants

**Supplemental Table S1**

**Thirty -seven food groups which were driven from the original Food Frequency Questionnaire**

| <b>Group code</b> | <b>Group name</b>  | <b>Food item/Related foods</b>                                                  |
|-------------------|--------------------|---------------------------------------------------------------------------------|
| 0                 | Water              | Water                                                                           |
| 1                 | Milk               | Cow's milk (irrespective of fat % )                                             |
| 2                 | Bread              | Bread, whole wheat or rye including toast                                       |
|                   |                    | Light/ diet bread (all types) including toast                                   |
|                   |                    | Injera (traditional Ethiopian bread)                                            |
|                   |                    | Tabun bread (traditional flat Arab bread)                                       |
|                   |                    | Pita with Za'atar (traditional Arab bread with spices)                          |
|                   |                    | Pita bread (traditional Arab bread)                                             |
| 3                 | Grains             | Rice, cooked                                                                    |
|                   |                    | Pasta, spaghetti, noodles, short-cut pasta                                      |
|                   |                    | Couscous with or without gravy                                                  |
| 4                 | Cereals            | Unsweetened breakfast cereals, e.g., cornflakes or bran flakes                  |
|                   |                    | Sweetened breakfast cereals, e.g., Frosties or Coco pops                        |
|                   |                    | Cream-filled Breakfast cereals e.g., Fillows                                    |
| 5                 | Cakes              | Cookies                                                                         |
|                   |                    | Plain cake, e.g., sponge, chiffon or pound cake                                 |
|                   |                    | Individual pastry or danish (e.g., croissant)                                   |
| 6                 | Fruits             | Apple, pear                                                                     |
|                   |                    | Citrus fruit e.g. orange, tangerine                                             |
|                   |                    | Banana                                                                          |
|                   |                    | Plums, peaches, nectarines                                                      |
|                   |                    | Melon                                                                           |
|                   |                    | Watermelon                                                                      |
|                   |                    | Other fruit, e.g., persimmon, mango, guava, strawberries, grapes                |
| 7                 | Starchy vegetables | Potatoes, mashed                                                                |
|                   |                    | Potatoes, cooked or baked in the oven                                           |
|                   |                    | Corn, Sweet corn                                                                |
| 8                 | Cooked vegetables  | Green beans, cooked                                                             |
|                   |                    | Zucchini or eggplant baked or cooked                                            |
|                   |                    | Carrot, cooked or raw                                                           |
|                   |                    | Broccoli or cauliflower                                                         |
|                   |                    | Other cooked vegetables (e.g. peas, mushrooms, pumpkin, spinach)                |
|                   |                    | Vegetable soup                                                                  |
| 9                 | Fresh vegetables   | Fresh vegetable salad                                                           |
|                   |                    | Cabbage salad                                                                   |
|                   |                    | Tomatoes including cherry tomato (including in a sandwich, not including salad) |

|    |                                |                                                                                                                                   |
|----|--------------------------------|-----------------------------------------------------------------------------------------------------------------------------------|
|    |                                | Cucumber (including in a sandwich, not including in salad)                                                                        |
|    |                                | Peppers- all colors                                                                                                               |
|    |                                | Other fresh vegetables eg: kohlrabi, fennel                                                                                       |
| 10 | Legumes                        | Cooked legumes e.g, chickpeas, white beans, lentils                                                                               |
| 11 | Sugars                         | Sugar (added to drinks/ cereals/yogurt, etc.)                                                                                     |
|    |                                | Honey or jam                                                                                                                      |
| 12 | Candies & sweet drinks         | Popsicle                                                                                                                          |
|    |                                | Candies- any kind                                                                                                                 |
|    |                                | Carbonated sugar-sweetened drink                                                                                                  |
|    |                                | Energy drink (XL or BLU)                                                                                                          |
|    |                                | Sweet soft drink such as Spring or water with syrup                                                                               |
|    |                                | Flavored water                                                                                                                    |
| 13 | Fruit juice                    | Fruit juice drink/ nectar (orange, apple, banana, strawberry, or other)                                                           |
| 14 | Chocolate                      | Chocolate spread                                                                                                                  |
|    |                                | Chocolate (squares)                                                                                                               |
|    |                                | Chocolate bar (e.g., Mars Bar, Maltesers, Kit Kat)                                                                                |
|    |                                | Cereal snack, Energy bar, Shugi, Nature-valley,                                                                                   |
| 15 | Fats (MUFA)                    | Avocado (including avocado salad)                                                                                                 |
|    |                                | Olive or canola oil (not including the oil in a salad)                                                                            |
| 16 | Sugar-free drinks              | Diet carbonated soft drink (e.g., Diet Coke, diet Sprite, etc.                                                                    |
| 17 | Salty snacks                   | Crackers, any kind                                                                                                                |
|    |                                | Salty snacks- e.g., crisps, Doritos (Tortilla chip crisp), Cheetos (cheese snack), Bamba (peanut butter flavored snack), pretzels |
| 18 | Yogurt & soft cheese           | Natural Yogurt (e.g., Leben, Kafir or other unsweetened yogurts)                                                                  |
|    |                                | Yogurt with fruit or other toppings (granola, chocolate)                                                                          |
|    |                                | Soft cheese (including additional ingredients, e.g., olives)                                                                      |
|    |                                | Cottage cheese (including additional ingredients, e.g., olives)                                                                   |
| 19 | Hard cheese and high-fat dairy | Sour cream                                                                                                                        |
|    |                                | Hard cheese, any kind                                                                                                             |
|    |                                | Salty cheese, e.g., Bulgarian cheese                                                                                              |
| 20 | Chocolate drink & deserts      | Chocolate drink (based on milk)                                                                                                   |
|    |                                | Chocolate/vanilla pudding                                                                                                         |
|    |                                | Ice cream                                                                                                                         |
| 21 | Oily spreads                   | Margarine, butter                                                                                                                 |
|    |                                | Mayonnaise, any type including salad dressing                                                                                     |
| 22 | Beef & chicken                 | Beef, steak, roast                                                                                                                |
|    |                                | Chicken                                                                                                                           |
| 23 | Processed beef                 | Schnitzel (chicken/turkey)                                                                                                        |
|    |                                | Meatballs: beef, chicken, turkey                                                                                                  |
|    |                                | Hamburger or kabab                                                                                                                |
|    |                                | Salami, pastrami                                                                                                                  |
|    |                                | Sausages (hot dogs)                                                                                                               |
| 24 | Fish                           | Fish, fried or baked                                                                                                              |
|    |                                | Tuna (in oil/ water)                                                                                                              |

|    |                 |                                                                 |
|----|-----------------|-----------------------------------------------------------------|
| 25 | Egg             | Egg, fried, omelet, scrambled or egg dishes (e.g., 'Shakshuka') |
|    |                 | Egg, soft/hard-boiled                                           |
| 26 |                 | Vegetarian schnitzel/sausage (including corn schnitzel )        |
| 27 | Hummus & Tahini | Hummus salad                                                    |
|    |                 | Tahini paste (traditional sesame paste)                         |
| 28 | Nuts & seeds    | Seeds (sunflower, pumpkin, watermelon)                          |
|    |                 | Walnuts, almonds, pistachios, peanuts                           |
| 29 | Fried foods     | Falafel                                                         |
|    |                 | French fries                                                    |
| 30 | Savory Pastries | Bourekas                                                        |
|    |                 | Melawach, Jahnun (traditional Yammaite pasteries)               |
| 31 | Pizza           | Pizza                                                           |
| 32 | Pickles         | Olives                                                          |
|    |                 | Pickled vegetables (e.g.,cucumber, eggplant, tomato)            |
| 33 | Alcohol drinks  | Alcoholic beer                                                  |
|    |                 | Wine                                                            |
| 34 | Hot drinks      | Tea - any kind                                                  |
|    |                 | Coffee (including with milk)                                    |
| 35 | Deserts         | Cream cake or cheesecake                                        |
|    |                 | Ice cream popsicle (dairy)                                      |
| 36 | White bread     | White bread, challah including toast                            |
|    |                 | White bun (roll)                                                |
|    |                 | Pita                                                            |
| 37 | Ketchup         | Ketchup                                                         |

Food items were grouped from an original list of 103 food items in the Mabat-Youth 2 food frequency questionnaire (FFQ).

**Supplemental Table S2****Varimax-rotated factor loadings of the five dietary patterns**

| <b>Loadings for the first component: 'plant-based food'</b>                    |                                    |
|--------------------------------------------------------------------------------|------------------------------------|
| <b>Variables</b>                                                               | <b>Principal component loading</b> |
| Vegetables, fresh                                                              | 0.68                               |
| Vegetables, cooked                                                             | 0.65                               |
| Fruit, fresh                                                                   | 0.64                               |
| Legumes                                                                        | 0.47                               |
| White bread                                                                    | -0.47                              |
| <b>Loadings for the second component: 'junk-food'</b>                          |                                    |
| <b>Variables</b>                                                               | <b>Principal component loading</b> |
| Candies and soft drinks                                                        | 0.57                               |
| Salty snacks                                                                   | 0.55                               |
| Cream cakes and ice cream                                                      | 0.55                               |
| White bread                                                                    | -0.45                              |
| Eggs                                                                           | -0.36                              |
| <b>Loadings for the third component: 'hot sweetened beverages and spreads'</b> |                                    |
| <b>Variables</b>                                                               | <b>Principal component loading</b> |
| Sugar, honey, or jam                                                           | 0.64                               |
| Coffee and Tea                                                                 | 0.64                               |
| Butter, Margarine, and Mayonnaise                                              | 0.46                               |
| Avocado, Olive oil, and Canola oil                                             | 0.39                               |
| <b>Loadings for the fourth component: 'cereals and milk'</b>                   |                                    |
| <b>Variables</b>                                                               | <b>Principal component loading</b> |

|                                                       |                                    |
|-------------------------------------------------------|------------------------------------|
| Milk                                                  | 0.66                               |
| Breakfast cereals, all types                          | 0.59                               |
| Chocolate drinks and pudding                          | 0.35                               |
| White Bread                                           | -0.36                              |
| <b>Loadings for the fifth component: 'carnivores'</b> |                                    |
| <b>Variables</b>                                      | <b>Principal component loading</b> |
| Beef and Chicken                                      | 0.69                               |
| Meatballs, Hamburgers, Schnitzel, Kabab               | 0.57                               |
| White bread                                           | -0.42                              |
